# Supplementary material for: Nanopore Sequencing of a Forensic STR Multiplex Reveals Loci Suitable for Single-Contributor STR Profiling
Source: PubMed Central journal article supplement (PMC7230633; doi:10.3390/genes11040381), 2020-04-01
Supplement: genes-11-00381-s001.pdf [file genes-11-00381-s001.pdf]

## SUPPLEMENTARY DATA

|                   | <b>9947A</b> | <b>9948</b> |
|-------------------|--------------|-------------|
| <b>Amelogenin</b> | X : X        | X : Y       |
| <b>D13S317</b>    | 11 : 11      | 11 : 11     |
| <b>D16S539</b>    | 11 : 12      | 11 : 11     |
| <b>D18S51</b>     | 15 : 19      | 15 : 18     |
| <b>D21S11</b>     | 30 : 30      | 29 : 30     |
| <b>D3S1358</b>    | 14 : 15      | 15 : 17     |
| <b>D5S818</b>     | 11 : 11      | 11 : 13     |
| <b>D7S820</b>     | 10 : 11      | 11 : 11     |
| <b>D8S1179</b>    | 13 : 13      | 12 : 13     |
| <b>FGA</b>        | 23 : 24      | 24 : 26     |
| <b>CD4</b>        | 5 : 5        | 4 : 4       |
| <b>TH01</b>       | 8 : 9.3      | 6 : 9.3     |
| <b>TPOX</b>       | 8 : 8        | 8 : 9       |
| <b>vWA</b>        | 17 : 18      | 17 : 17     |
| <b>SE33</b>       | 19 : 29.2    | 23.2 : 26.2 |

**Supplementary Table 1:** True STR-profile of the examined reference samples as confirmed by capillary electrophoresis.

|            | Forward primer                    | Concentration ( $\mu\text{M}$ ) | Reverse Primer                 | Concentration ( $\mu\text{M}$ ) |
|------------|-----------------------------------|---------------------------------|--------------------------------|---------------------------------|
| Amelogenin | CCCTGGGCTCTGTAAAGAA               | 0.5                             | ATCAGAGCTTAAACTGGGAAGCTG       | 0.5                             |
| D13S317    | ATTACAGAAGTCTGGGATGTGGAGGA        | 0.5                             | GGCAGCCCCAAAAAGACAGA           | 0.5                             |
| D16S539    | GGGGGTCTAAGAGCTTGAAAAAG           | 0.8                             | GTTTGTGTGTCATCTGTAAGCATGTATC   | 0.8                             |
| D18S51     | TTCTTGAGCCCAGAAGGTTA              | 0.5                             | ATTCTACCAGCAACAACAAAATAAAC     | 0.5                             |
| D21S11     | ATATGTGAGTCAATCCCCAAG             | 0.5                             | TGTATTAGTCAATGTTCTCCAGAGAC     | 0.5                             |
| D3S1358    | ACTGCAGTCCAATCTGGGT               | 0.5                             | ATGAAATCAACAGAGGCTTGC          | 0.5                             |
| D5S818     | GGTGATTTTCCTCTTTGGTATCC           | 0.5                             | AGCCACAGTTTACAACATTTGTATCT     | 0.5                             |
| D7S820     | ATGTTGGTCAGGCTGACTATG             | 0.6                             | GATCCACATTTATCCTCATTGAC        | 0.6                             |
| D8S1179    | ATIGCAACTTATATGTATTTTTGTATTTTCATG | 1                               | ACCAAATTGTGTTTCATGAGTATAGTTTC  | 1                               |
| FGA        | GGCTGCAGGGCATAACATTA              | 0.5                             | ATTCTATGACTTTGCGCTTCAGGA       | 0.5                             |
| CD4        | TTACCGGTTTGGAGTCGCAAGCTGAACTAGCG  | 0.15                            | CCAGGAAGTTGAGGCTGCAGTGAA       | 0.6                             |
| TH01       | GTGATTCCCATGGCCTGTC               | 0.5                             | ATTCCTGTGGGCTGAAAAGCTC         | 0.5                             |
| TPOX       | GCACAGAACAGGCACTTAGG              | 0.25                            | CGCTCAAACGTGAGGTTG             | 0.25                            |
| vWA        | GCCCTAGTGGATGATAAGAATAATCAGTATGTG | 0.5                             | GGACAGATGATAAATACATAGGATGGATGG | 0.5                             |
| SE33       | ACATCTCCCCTACCGCTATA              | 0.5                             | AATCTGGGCGACAAGAGTGA           | 1                               |

**Supplementary Table 2:** Forward and reverse primer sequences and concentrations used in the STR multiplex PCR reaction.

| Locus      | Allele  | Locus  | Allele | Locus  | Allele  | Locus   | Allele | Locus   | Allele | Locus | Allele | Locus | Allele |      |
|------------|---------|--------|--------|--------|---------|---------|--------|---------|--------|-------|--------|-------|--------|------|
| Amelogenin | X       | D7S820 | 7      | D21S11 | 26      | D16S539 | 5      | D8S1179 | 10     | SE33  | 7      | SE33  | 26.2   |      |
|            | Y       |        | 8      |        | 27      |         | 6      |         | 11     |       | 8      |       | 27     |      |
| CD4        | 4       |        | 9      |        | 28      |         | 7      |         | 12     |       | 9      |       | 27.2   |      |
|            | 5       |        | 10     |        | 29      |         | 8      |         | 13     |       | 10     |       | 27.3   |      |
|            | 6       |        | 11     |        | 29.2    |         | 9      |         | 14     |       | 10.2   |       | 28.2   |      |
|            | 7       |        | 12     |        | 30      |         | 10     |         | 15     |       | 11     |       | 28.3   |      |
|            | 8       |        | 13     |        | 30.2    |         | 11     |         | 16     |       | 12     |       | 29.2   |      |
|            | 9       |        | 14     |        | 30.3    |         | 12     |         | 17     |       | 13     |       | 30     |      |
|            | 10      |        | D18S51 |        | 9       |         | 31     |         | 13     |       | 18     |       | 13.2   | 30.2 |
|            | 11      |        |        |        | 10      |         | 31.2   |         | 14     |       | FGA    |       | 15.2   | 31   |
|            | D16S317 |        | 7      |        | 11      |         | 32     |         | 15     |       |        |       | 19     | 16   |
|            |         | 8      | 12     | 32.2   | 16      | 20      | 17     | 32      |        |       |        |       |        |      |
| 9          |         | 13     | 33     | TPOX   | 6       | 21      | 17.2   | 32.2    |        |       |        |       |        |      |
| 10         |         | 13.2   | 33.1   |        | 7       | 22      | 17.3   | 33      |        |       |        |       |        |      |
| 11         |         | 14     | 33.2   | 8      | 23      | 18      | 34     |         |        |       |        |       |        |      |
| 12         |         | 14.2   | 34     | 9      | 23.3    | 18.3    | 34.2   |         |        |       |        |       |        |      |
| 13         |         | 15     | 35     | 10     | 24      | 19      | 35     |         |        |       |        |       |        |      |
| 14         |         | 15.2   | 36     | 11     | 25      | 19.2    | 36     |         |        |       |        |       |        |      |
| 15         |         | 16     | 37     | vWA    | 11      | 26      | 20     |         |        |       |        |       |        |      |
| D5S818     |         | 7      | 16.2   |        | 38      | 12      | 27     | 20.2    |        |       |        |       |        |      |
|            | 8       | 17     | 39     | 13     | D3S1358 | 11      | 21     |         |        |       |        |       |        |      |
|            | 9       | 18     | TH01   | 5      |         | 12      | 21.2   |         |        |       |        |       |        |      |
|            | 10      | 19     |        | 6      |         | 13      | 22     |         |        |       |        |       |        |      |
|            | 11      | 20     |        | 7      |         | 14      | 22.2   |         |        |       |        |       |        |      |
|            | 12      | 21     |        | 8      |         | 15      | 23     |         |        |       |        |       |        |      |
|            | 13      | 21.2   |        | 9      |         | 16      | 23.2   |         |        |       |        |       |        |      |
|            | 14      | 22     |        | 9.3    |         | 17      | 24     |         |        |       |        |       |        |      |
|            | 15      | 23     |        | 10     |         | 18      | 24.2   |         |        |       |        |       |        |      |
|            | 16      | 24     |        | 11     |         | 19      | 25.2   |         |        |       |        |       |        |      |
|            |         |        |        |        |         | 20      | 26     |         |        |       |        |       |        |      |

**Supplementary Table 3:** Alleles encompassed in reference database for alignment.

| Locus   | Allele | Sample A | Sample B | Sample C | Locus   | Allele | Sample A | Sample B | Sample C |      |
|---------|--------|----------|----------|----------|---------|--------|----------|----------|----------|------|
| Amel    | X      | 100%     | 100%     | 100%     | D8S1179 | 11     | 1%       | 6%       | 4%       |      |
|         | Y      | 0%       | 94%      | 27%      |         | 12     | 10%      | 100%     | 37%      |      |
| CD4     | 4      | 2%       | 100%     | 59%      |         | 13     | 100%     | 80%      | 100%     |      |
|         | 5      | 100%     | 0%       | 100%     |         | 14     | 1%       | 0%       | 1%       |      |
| D13S317 | 9      | 1%       | 1%       | 1%       | FGA     | 16.2   | 7%       | 10%      | 0%       |      |
|         | 10     | 9%       | 10%      | 9%       |         | 22     | 13%      | 10%      | 0%       |      |
|         | 11     | 100%     | 100%     | 100%     |         | 23     | 100%     | 10%      | 75%      |      |
|         | 12     | 1%       | 1%       | 1%       |         | 24     | 73%      | 100%     | 100%     |      |
| D16S539 | 8      | 0%       | 1%       | 2%       |         | 25     | 0%       | 0%       | 0%       |      |
|         | 9      | 1%       | 0%       | 2%       |         | 26     | 7%       | 30%      | 25%      |      |
|         | 10     | 10%      | 9%       | 14%      |         | 27     | 0%       | 0%       | 25%      |      |
|         | 11     | 100%     | 100%     | 100%     |         | 28     | 0%       | 10%      | 0%       |      |
|         | 12     | 76%      | 0%       | 33%      |         | 29     | 7%       | 0%       | 0%       |      |
| D18S51  | 13     | 2%       | 0%       | 0%       | TH01    | 5      | 1%       | 5%       | 2%       |      |
|         | 14     | 14%      | 11%      | 13%      |         | 6      | 1%       | 94%      | 36%      |      |
|         | 15     | 100%     | 100%     | 100%     |         | 7      | 5%       | 1%       | 4%       |      |
|         | 17     | 0%       | 11%      | 8%       |         | 8      | 96%      | 0%       | 68%      |      |
|         | 18     | 5%       | 53%      | 29%      |         | 9      | 4%       | 3%       | 4%       |      |
|         | 19     | 34%      | 0%       | 54%      |         | 9.3    | 100%     | 100%     | 100%     |      |
| D21S11  | 27     | 0%       | 2%       | 1%       |         | 10     | 1%       | 1%       | 1%       |      |
|         | 28     | 2%       | 11%      | 5%       |         | TPOX   | 7        | 3%       | 4%       | 5%   |
|         | 29     | 16%      | 100%     | 41%      |         |        | 8        | 100%     | 100%     | 100% |
|         | 30     | 100%     | 77%      | 100%     |         |        | 9        | 0%       | 84%      | 15%  |
|         | 31     | 1%       | 2%       | 1%       | vWA     | 15     | 3%       | 3%       | 3%       |      |
| D3S1358 | 12     | 1%       | 0%       | 1%       |         | 16     | 16%      | 15%      | 15%      |      |
|         | 13     | 9%       | 1%       | 7%       |         | 17     | 100%     | 100%     | 100%     |      |
|         | 14     | 100%     | 11%      | 74%      |         | 18     | 73%      | 1%       | 39%      |      |
|         | 15     | 88%      | 100%     | 100%     |         | 19     | 1%       | 0%       | 1%       |      |
|         | 16     | 0%       | 14%      | 7%       |         | 20     | 1%       | 0%       | 0%       |      |
| D5S818  | 17     | 0%       | 81%      | 37%      | SE33    | 18     | 18%      | 0%       | 18%      |      |
|         | 7      | 2%       | 5%       | 4%       |         | 19     | 100%     | 1%       | 100%     |      |
|         | 8      | 0%       | 1%       | 1%       |         | 20     | 5%       | 1%       | 7%       |      |
|         | 9      | 2%       | 2%       | 1%       |         | 21     | 1%       | 1%       | 1%       |      |
|         | 10     | 10%      | 11%      | 10%      |         | 22     | 2%       | 0%       | 4%       |      |
|         | 11     | 100%     | 100%     | 100%     |         | 22.2   | 1%       | 11%      | 8%       |      |
|         | 12     | 1%       | 14%      | 4%       |         | 23     | 1%       | 2%       | 6%       |      |
|         | 13     | 0%       | 96%      | 26%      |         | 23.2   | 0%       | 100%     | 68%      |      |
| 14      | 0%     | 1%       | 1%       | 24       |         | 1%     | 0%       | 0%       |          |      |
| D7S820  | 8      | 1%       | 0%       | 1%       |         | 24.2   | 1%       | 4%       | 4%       |      |
|         | 9      | 8%       | 2%       | 4%       |         | 25.2   | 1%       | 11%      | 9%       |      |
|         | 10     | 100%     | 9%       | 54%      |         | 26     | 1%       | 0%       | 0%       |      |
|         | 10.3   | 6%       | 9%       | 8%       |         | 26.2   | 0%       | 57%      | 48%      |      |
|         | 11     | 86%      | 100%     | 100%     |         | 27.2   | 3%       | 5%       | 4%       |      |
|         | 13     | 0%       | 0%       | 0%       | 28.2    | 7%     | 4%       | 13%      |          |      |
|         | 14     | 0%       | 0%       | 0%       | 29.2    | 55%    | 1%       | 29%      |          |      |

**Supplementary Table 4:** Allele representation by Illumina reads for all samples. Grey indicates true alleles.

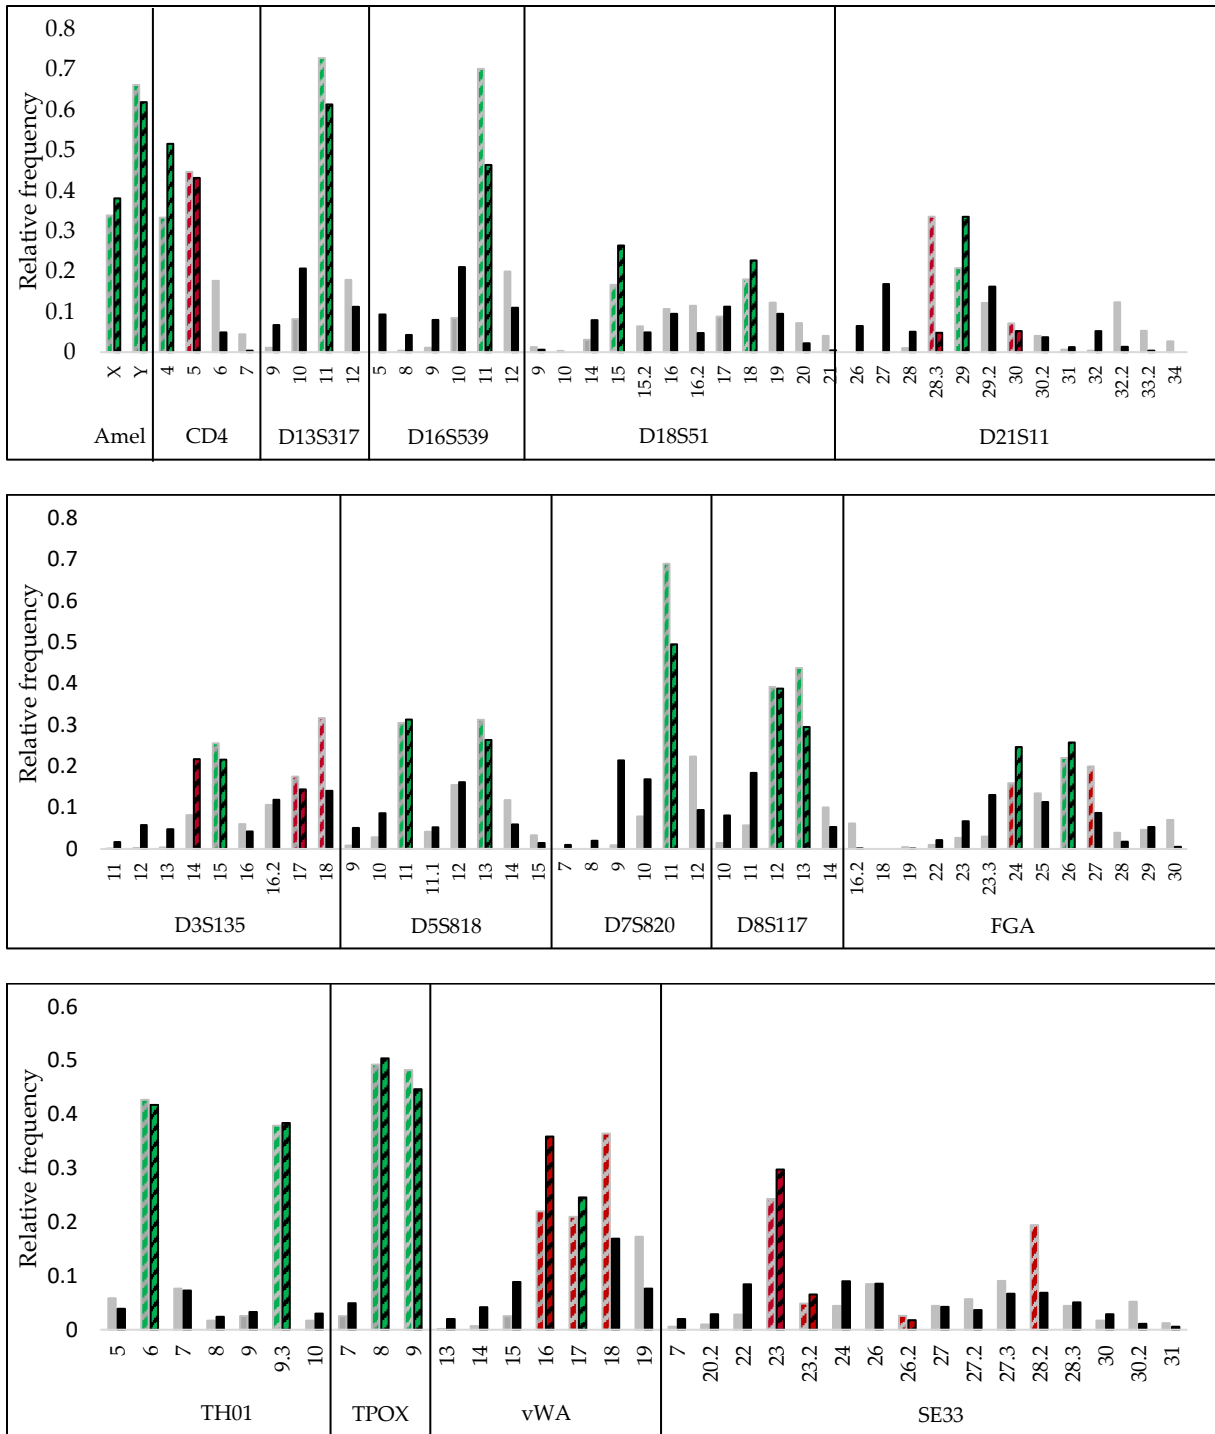

**Supplementary Figure 1:** Relative frequency of aligned reads per locus, sample B. Grey indicates R9.4 data, black indicates R10 data. Green colored bars indicate true positive alleles, red colored bars indicate drop-ins or drop-outs.

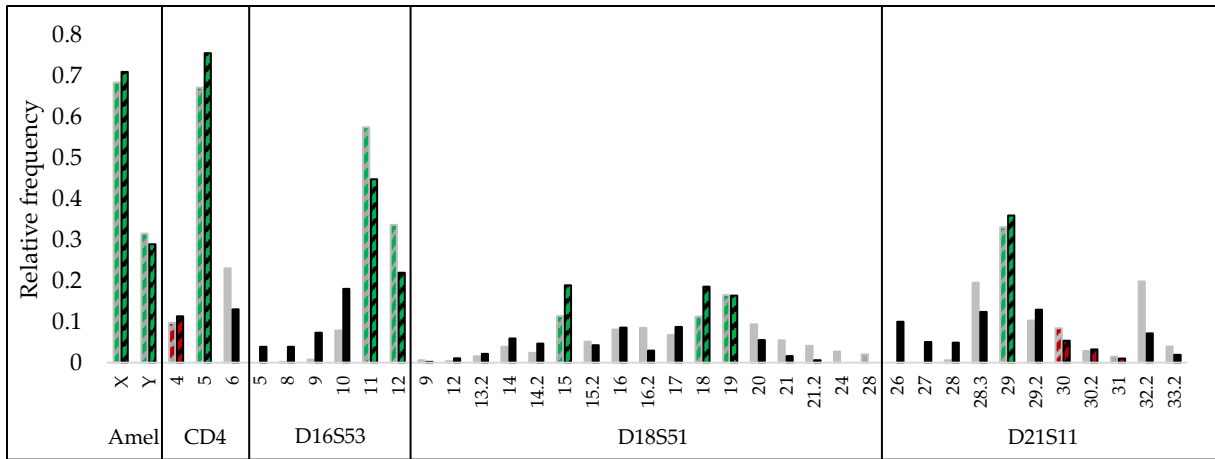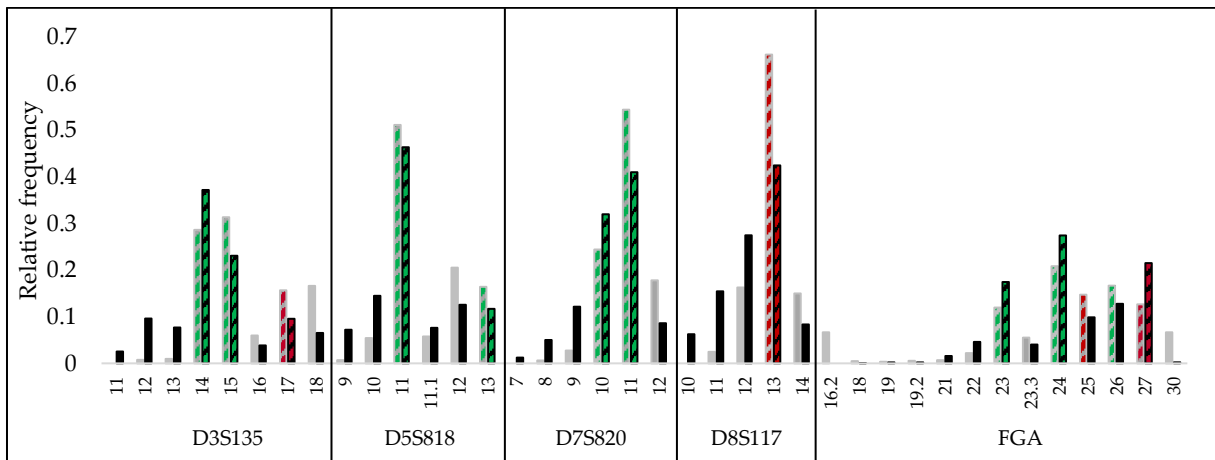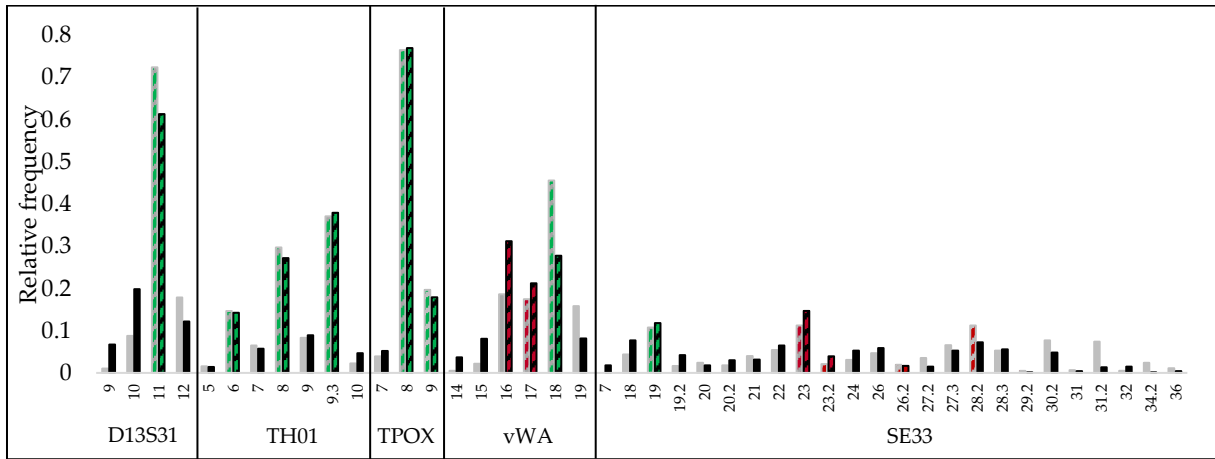

**Supplementary Figure 2:** Relative frequency of aligned reads per locus, sample C. Grey indicates R9.4 data, black indicates R10 data. Green colored bars indicate true positive alleles, red colored bars indicate drop-ins or drop-outs.
